# Supplementary material for: Peripheral Blood Lymphocyte Subsets Predict the Efficacy of Immune Checkpoint Inhibitors in Non–Small Cell Lung Cancer
Source: Front Immunol. 2022 Jul 1;13:912180. doi: 10.3389/fimmu.2022.912180 (PMC9283649; doi:10.3389/fimmu.2022.912180)
Supplement: Supplementary file 6 [file Table_1.xlsx]

## Sheet: source data
ID	Total lymphocyte	B cell	NK cell	T cell	CD4+T / lymphocyte (%)	CD4+T	CD8+T / lymphocyte (%)	CD8+T	CD4+CD45RA-T	CD4+CD45RA+T	CD4+CD28+T	CD8+CD28+T	CD8+DR+T	CD8+CD38+T	Sex	Age	Histology	Line of therapy	Combined chemotherapy	Smoking status	Drinking status	ECOG PS	CIP	liver injury	kidney injury	Skin toxicity	Gastrointestinal toxicity	Myocarditis	Abnormal thyroid function	grade of irAE	irAE	benefit	PD or NOT	PFS	ORR
1876968	0.64	60.8	87.68	488.96	33.1	211.84	36.1	231.04	150.406	61.4336	173.709	26.3386	204.701	194.305	2	80	1	2	1	0	0	2	0	0	0	0	0	0	0	0	0	0	1	2.17105	0
2008468	1.67	267.2	217.1	1165.66	33.2	554.44	34.1	569.47	528.381	26.0587	533.371	479.494	87.6984	89.9763	2	58	2	1	2	1	0	0	0	0	0	0	0	0	0	0	0	1	0	11.3487	0
2067031	1.89	192.78	601.02	1092.42	30.1	568.89	22.7	429.03	410.739	158.151	494.365	158.312	252.27	175.044	2	53	1	2	1	0	0	1	0	0	0	0	0	0	0	0	0	1	0	17.1053	0
2071975	2.08	97.76	422.24	1551.68	30.8	640.64	40.2	836.16	513.793	126.847	556.076	157.198	350.351	316.905	1	58	2	1	0	1	1	0	0	0	0	0	0	0	0	0	0	1	1	11.5461	0
2078699	0.28	4.48	24.36	250.32	49.2	137.76	37.3	104.44	120.678	17.0822	136.107	72.7947	53.5777	52.9511	1	69	2	2	0	0	0	0	0	0	0	0	0	0	0	0	0	0	1	3.58553	0
2174613	0.53	13.25	93.81	420.29	33.2	175.96	43	227.9	165.754	10.2057	95.7222	67.2305	179.585	164.088	1	74	1	2	2	1	1	0	0	0	0	0	0	0	0	0	0	1	1	6.15132	0
2183888	0.89	30.26	263.44	575.83	46	409.4	15.8	140.62	215.754	193.646	383.608	43.311	83.247	91.403	1	68	1	1	0	1	1	1	0	0	0	0	0	0	0	0	0	0	1	6.01974	0
2185706	1.16	110.2	257.52	780.68	37.8	438.48	21.9	254.04	395.509	42.971	434.972	115.334	147.597	18.799	1	64	2	2	0	1	1	1	0	0	0	0	0	0	0	0	0	1	0	18.6513	1
2241721	1.21	81.07	196.02	922.02	28.9	349.69	41	496.1	307.727	41.9628	295.838	109.638	234.655	287.738	1	70	1	1	0	1	0	0	0	0	0	0	0	0	0	0	0	0	1	0.559211	0
2244164	0.66	7.92	261.36	382.8	34.9	230.34	22.5	148.5	144.884	85.4561	204.312	78.408	56.727	88.506	1	64	1	1	2	0	0	0	0	0	0	0	0	0	0	0	0	1	1	8.51974	0
2280341	1.44	194.4	213.12	1003.68	47.8	688.32	18.4	264.96	551.344	136.976	688.32	194.746	51.6672	103.069	1	70	1	1	2	1	1	0	0	0	0	0	0	0	0	0	0	0	1	2.59868	0
2285659	0.52	88.92	87.88	342.16	36.7	190.84	22.3	115.96	124.428	66.4123	190.84	101.349	17.278	42.6733	1	60	1	2	2	1	0	0	0	0	0	0	0	0	0	0	0	1	0	5.82237	0
2293131	1.37	184.95	42.47	1137.1	49.3	675.41	26.8	367.16	505.207	170.203	674.059	213.687	208.18	161.183	1	47	1	1	2	1	0	1	0	0	0	0	0	0	0	0	0	1	1	12.7632	1
2323716	1.14	176.7	90.06	845.88	54	615.6	18.5	210.9	358.895	256.705	544.19	193.184	25.308	54.2013	1	52	1	1	0	0	0	0	0	0	0	0	0	0	0	0	0	1	0	10.0987	1
2326749	2.06	65.92	506.76	1427.58	40.6	836.36	22.3	459.38	626.434	209.926	741.015	254.956	161.242	140.111	2	66	1	1	2	0	0	0	0	0	0	0	0	0	0	0	0	1	1	9.14474	0
2327315	1.24	110.36	183.52	933.72	21.3	264.12	51.2	634.88	199.411	64.7094	134.701	93.3274	545.362	175.862	1	69	2	1	2	1	1	1	0	0	0	0	0	0	0	0	0	1	1	18.8487	0
2327322	1.52	74	234.08	1136.96	34.5	524.4	36.3	551.76	394.873	129.527	457.801	121.939	345.402	279.742	2	61	2	1	2	1	0	2	0	0	0	0	0	0	0	0	0	1	1	15.625	1
2327770	1.55	164.3	263.5	1120.65	47.7	739.35	20.9	323.95	545.64	193.71	734.914	131.2	146.749	76.7761	1	65	1	1	2	1	0	0	0	0	0	0	0	0	0	0	0	1	1	13.8816	1
2328622	1.33	117.04	289.94	920.36	34.6	460.18	33.7	448.21	337.772	122.408	324.887	164.941	129.084	192.282	1	66	1	2	2	1	1	0	0	0	0	0	0	0	0	0	0	0	1	5.19737	0
2354799	1.73	183.38	223.17	1323.45	47.2	816.56	25.3	437.69	696.526	120.034	804.312	252.985	136.559	96.7295	1	56	2	1	2	1	1	1	0	0	0	0	0	0	0	0	0	0	1	2.76316	0
2370589	1.1	68.2	389.4	634.7	22.4	246.4	32.3	355.3	205.498	40.9024	218.31	93.7992	167.702	75.3236	2	70	1	2	2	0	0	0	0	0	0	0	0	0	0	0	0	0	1	0.493421	0
2374124	1.8	230.4	300.6	1260	57.5	1035	12.4	223.2	846.63	188.37	972.9	97.3152	81.2448	71.424	1	70	1	1	2	1	0	1	0	0	0	0	0	0	0	0	0	1	1	6.51316	0
2383087	1.9	123.5	539.6	1223.6	30.2	573.8	27.3	518.7	399.939	173.861	573.8	292.028	162.353	194.512	1	64	1	1	0	1	0	1	0	0	0	0	0	0	0	0	0	1	1	8.98026	0
2393972	1.89	209.79	631.26	1039.5	23.2	438.48	27.6	521.64	299.043	139.437	417.871	166.925	346.891	225.87	2	61	1	1	2	0	0	1	0	0	0	0	0	0	0	0	0	1	1	7.46711	0
2394102	0.97	83.42	32.01	854.57	55	533.5	30.6	296.82	328.103	205.398	526.565	111.901	192.339	117.541	1	60	2	1	2	1	0	0	0	0	0	0	0	0	0	0	0	0	1	5.55921	0
2403441	1.25	226.25	317.5	686.25	24.7	308.75	26.2	327.5	259.041	49.7088	253.792	33.0775	192.57	156.873	2	63	1	2	2	0	0	0	0	0	0	0	0	0	0	0	0	1	0	21.0197	1
2403853	1.28	74.24	259.84	944.64	30.8	394.24	36.5	467.2	312.632	81.6077	352.451	212.109	216.314	169.594	1	58	1	1	2	1	0	1	0	0	0	0	0	0	0	0	0	0	1	1.21711	0
2404208	1.07	132.68	238.61	675.17	33.3	356.31	25.6	273.92	206.66	149.65	318.897	215.301	44.375	72.8627	2	79	1	2	1	0	0	1	0	0	0	0	0	0	0	0	0	1	1	27.1053	0
2407531	0.79	157.21	206.19	406.06	24.6	194.34	23.7	187.23	153.14	41.2001	176.461	135.555	40.4417	69.4623	1	66	1	2	2	1	0	1	0	0	0	0	0	0	0	0	0	0	1	5.46053	0
2413861	1.3	132.6	152.1	1014	36.7	477.1	38.5	500.5	350.191	126.909	456.585	137.137	406.906	259.76	2	79	1	2	1	0	0	1	0	0	0	0	0	0	0	0	0	1	1	6.77632	1
2413961	2.38	321.3	368.9	1682.66	42.7	1016.26	21.9	521.22	682.927	333.333	979.675	345.048	151.154	178.257	1	60	2	1	0	1	0	0	0	0	0	0	0	0	0	0	0	1	0	25.0329	0
2415991	1.25	21.25	307.5	916.25	38.4	480	32.3	403.75	266.4	213.6	441.6	156.251	208.335	173.209	1	63	2	2	0	1	1	1	0	0	0	0	0	0	0	0	0	0	1	0.953947	0
2416434	1.05	150.15	206.85	685.65	41	430.5	22.8	239.4	296.615	133.886	418.877	210.911	67.5108	42.1344	2	74	1	2	1	0	0	1	0	0	0	0	0	0	0	0	0	0	1	0.953947	0
2417242	0.9	55.8	223.2	620.1	48.4	435.6	19.4	174.6	392.04	43.56	409.464	116.458	124.315	113.839	2	69	1	2	2	0	0	1	0	0	0	0	0	0	0	0	0	0	1	1.54605	0
2418747	1.35	85.05	83.7	1179.9	58.6	791.1	21.8	294.3	599.654	191.446	787.936	193.355	211.013	95.0589	1	64	2	1	2	1	1	0	0	0	0	0	0	0	0	0	0	0	1	5.52632	0
2421317	1.16	85.84	84.68	986	44.9	520.84	29.3	339.88	445.318	75.5218	496.361	161.783	130.514	94.1468	2	71	1	1	2	1	1	0	0	0	0	0	0	0	0	0	0	0	1	0.855263	0
2422956	1.72	94.6	302.72	1315.8	29.7	510.84	37.9	651.88	454.648	56.1924	491.428	238.588	257.493	118.642	1	74	2	1	2	1	0	1	0	0	0	0	0	0	0	0	0	1	1	7.76316	1
2426245	1.62	106.92	419.58	1093.5	37.1	601.02	25.3	409.86	444.154	156.866	507.862	257.392	240.588	165.583	2	32	1	2	2	0	0	0	0	0	0	0	0	0	0	0	0	1	0	13.4868	0
2434088	0.88	9.68	101.2	767.36	51.4	452.32	35.3	310.64	437.393	14.9266	452.32	186.695	198.188	152.524	1	63	2	1	2	1	1	1	0	0	0	0	0	0	0	0	0	0	1	2.92763	0
2437776	1.69	177.45	292.37	1213.42	54.9	927.81	13.8	233.22	635.55	292.26	923.171	223.658	70.6657	76.4962	1	55	2	1	2	1	1	1	0	0	0	0	0	0	0	0	0	1	0	15.0329	1
2445125	1.07	66.34	82.39	916.99	53.5	572.45	31.8	340.26	464.829	107.621	336.601	144.611	160.943	154.818	2	57	2	1	2	1	0	0	0	0	0	0	0	0	0	0	0	1	0	13.2566	1
2446773	1.33	73.15	357.77	887.11	26.8	356.44	37.5	498.75	348.955	7.48524	301.905	127.68	347.13	188.029	2	61	1	2	2	0	0	1	0	0	0	0	0	0	0	0	0	0	1	3.94737	0
2447917	0.88	17.6	235.84	616.88	23.9	210.32	43.3	381.04	199.383	10.9366	121.986	54.1077	263.299	237.769	2	55	1	3	1	0	0	1	0	0	0	0	0	0	0	0	0	1	1	7.5	0
2449545	1.01	189.88	253.51	551.46	20	202	31.7	320.17	142.208	59.792	189.072	148.239	190.821	124.226	1	69	2	1	1	1	0	1	0	0	0	0	0	0	0	0	0	1	1	6.25	1
2451276	1.46	24.82	191.26	1242.46	33.5	489.1	51.1	746.06	299.818	189.282	372.694	120.862	586.403	291.709	1	65	2	1	2	1	0	0	0	0	0	0	0	0	0	0	0	0	1	5.46053	1
2452577	1.07	172.27	278.2	604.55	40.9	437.63	13.6	145.52	267.392	170.238	430.628	120.927	47.1485	43.0739	1	71	2	1	2	1	0	1	0	0	0	0	0	0	0	0	0	1	0	8.71711	1
2453154	0.87	15.66	205.32	638.58	27.8	241.86	44.9	390.63	211.627	30.2325	222.511	202.346	321.098	334.77	1	64	2	1	2	1	1	1	0	0	0	0	0	0	0	0	0	1	0	8.51974	1
2453663	1.03	56.65	153.47	794.13	33.7	347.11	38.4	395.52	238.465	108.645	298.515	130.522	300.991	153.857	1	59	1	2	2	1	0	0	0	0	0	0	0	0	0	0	0	1	0	10.0658	1
2500464	1.49	293.53	399.32	797.15	23.8	354.62	15.9	236.91	291.852	62.7677	312.775	126.273	108.505	113.006	1	81	1	1	2	0	0	2	0	0	0	0	0	0	0	0	0	1	0	16.4145	0
2507656	0.93	25.11	103.23	797.01	66.3	616.59	19.1	177.63	324.326	292.264	616.59	140.505	54.5324	55.5982	1	61	2	3	1	0	0	2	0	0	0	0	0	0	0	0	0	0	1	3.35526	0
2509044	1.46	306.6	378.14	770.88	35.9	524.14	13.1	191.26	492.167	31.9725	473.298	109.401	128.335	70.3837	2	47	2	1	2	0	0	0	0	0	0	0	0	0	0	0	0	1	1	11.7763	1
2516474	1.17	74.88	77.22	1013.22	23.7	277.29	58.6	685.62	237.36	39.9298	270.912	277.676	491.59	194.03	2	63	1	2	1	0	0	1	0	0	0	0	0	0	0	0	0	0	1	2.17105	0
2516741	1.33	98.42	235.41	988.19	34.8	462.84	35.4	470.82	324.914	137.926	450.806	190.682	252.36	238.235	2	78	1	3	1	0	0	1	0	0	0	0	0	0	0	0	0	0	1	2.56579	0
2517727	0.94	90.24	59.22	786.78	55.3	519.82	23.2	218.08	342.042	177.778	330.086	83.5246	140.88	188.203	1	66	2	2	0	1	1	0	0	0	0	0	0	0	0	0	0	1	1	8.28947	0
2522178	1.52	39.52	428.64	1050.32	24.8	376.96	43.5	661.2	318.908	58.0518	235.977	161.994	291.589	177.202	1	68	1	1	2	1	1	1	0	0	0	0	0	0	0	0	0	1	1	9.01316	0
2523616	2.56	273.92	222.72	2058.24	37.3	954.88	41.7	1067.52	901.407	53.4733	854.618	612.756	397.117	102.482	1	68	1	1	2	1	0	0	0	0	0	0	0	0	0	0	0	1	1	6.21711	1
2525350	1.62	50.22	234.9	1328.4	29.3	474.66	45.7	740.34	418.65	56.0099	310.428	188.046	423.474	382.756	1	74	2	1	2	1	0	4	0	0	0	0	0	0	0	0	0	1	0	18.8487	0
2526400	1.07	87.74	284.62	691.22	34.7	371.29	25.7	274.99	296.661	74.6293	249.878	121.821	114.396	48.3982	1	65	1	1	2	0	0	0	0	0	0	0	0	0	0	0	0	0	1	5.09868	0
2528512	1.03	110.21	82.4	834.3	51.4	529.42	26.3	270.89	331.417	198.003	526.243	126.506	178.517	205.876	2	57	1	1	2	0	0	0	0	0	0	0	0	0	0	0	0	1	0	18.2566	1
2528823	1.99	141.29	471.63	1371.11	32.4	644.76	25.6	509.44	526.769	117.991	634.444	155.889	285.796	164.04	1	64	2	2	0	1	1	1	0	0	0	0	0	0	0	0	0	1	0	7.03947	1
2529824	1.2	76.8	278.4	822	32.8	393.6	28	336	347.549	46.0512	350.698	212.016	184.128	73.92	1	71	1	1	2	1	1	1	0	0	0	0	0	0	0	0	0	1	0	17.9934	1
2530222	1.5	33	271.5	1188	59.2	888	16.5	247.5	689.088	198.912	886.224	58.905	118.058	123.75	2	63	1	1	2	0	0	0	0	0	0	0	0	0	0	0	0	0	1	3.65132	1
2530769	1.71	157.32	494.19	1037.97	36.4	622.44	21.7	371.07	440.065	182.375	576.379	295.743	110.95	91.2832	2	64	1	1	2	0	0	1	0	0	0	0	0	0	0	0	0	0	1	3.125	0
2531914	0.59	9.44	166.38	408.28	33	194.7	30.5	179.95	142.326	52.3743	184.186	104.911	136.582	154.037	1	76	1	2	2	0	0	0	0	0	0	0	0	0	0	0	0	0	1	4.44079	0
2532332	1.81	76.02	307.7	1420.85	28.2	510.42	45.8	828.98	433.347	77.0734	328.2	271.905	738.621	522.257	1	64	1	1	2	1	1	0	0	0	0	0	0	0	0	0	0	1	0	14.0132	1
2532751	0.46	5.52	102.12	344.54	38.4	176.64	19.1	87.86	163.745	12.8947	149.614	38.0434	66.2464	60.6234	2	81	1	2	0	0	0	2	0	0	0	0	0	0	0	0	0	1	0	3.91447	0
2532919	0.61	89.67	92.11	426.39	17.9	109.19	47	286.7	95.4321	13.7579	107.334	22.0759	131.882	227.926	2	46	1	3	0	0	0	1	0	0	0	0	0	0	0	0	0	0	1	0.559211	0
2533229	0.87	33.06	199.23	625.53	45.1	392.37	21.6	187.92	282.899	109.471	355.095	95.8392	122.148	145.826	1	56	2	2	0	0	0	1	0	0	0	0	0	0	0	0	0	1	1	6.97368	0
2536402	3.1	502.2	285.2	2281.6	29.2	905.2	43.2	1339.2	846.362	58.838	761.273	617.371	815.573	303.998	1	53	1	2	2	0	0	1	0	0	0	0	0	0	0	0	0	1	0	14.9013	1
2536503	2.36	821.28	320.96	1208.32	34.2	807.12	13	306.8	511.714	295.406	753.85	148.491	168.433	102.778	1	64	1	1	2	1	0	1	0	0	0	0	0	0	0	0	0	1	0	15.1645	1
2539580	2.09	121.22	294.69	1674.09	35.6	744.04	41.4	865.26	598.208	145.832	683.029	382.445	670.576	268.231	1	82	2	1	1	0	0	2	0	0	0	0	0	0	0	0	0	1	0	11.0855	1
2546282	2.07	244.26	436.77	1370.34	40.8	844.56	19.5	403.65	638.487	206.073	827.669	222.411	254.703	150.965	1	52	2	1	2	1	0	0	0	0	0	0	0	0	0	0	0	1	1	7.59868	0
2549026	1.44	84.96	168.48	1144.8	35	504	36.8	529.92	330.12	173.88	397.152	185.472	386.312	249.062	2	67	1	1	2	0	0	0	0	0	0	0	0	0	0	0	0	0	1	3.45395	0
C282716	1.32	150.48	281.16	883.08	38.5	508.2	24.8	327.36	415.199	93.0006	508.2	189.214	167.608	96.5712	1	52	2	1	2	1	0	0	0	0	0	0	0	0	0	0	0	1	0	17.7303	1
C822941	0.79	94.8	25.28	665.18	46.5	367.35	32.7	258.33	314.819	52.5311	339.799	83.9573	175.664	113.665	2	62	1	2	0	0	0	0	0	0	0	0	0	0	0	0	0	1	0	12.5	0
C855968	2.53	290.95	513.59	1722.93	50.4	1275.12	13.5	341.55	823.728	451.392	1244.52	214.152	91.1938	173.166	1	68	2	1	0	1	1	0	0	0	0	0	0	0	0	0	0	1	1	12.8289	1
C881833	1.05	50.4	280.35	719.25	26.3	276.15	30.2	317.1	215.673	60.4769	211.531	113.522	181.381	227.361	1	44	1	2	1	0	0	2	0	0	0	0	0	0	0	0	0	0	1	2.76316	0
C913708	1.84	139.84	513.36	1183.12	31.2	574.08	29.6	544.64	378.319	195.761	451.227	283.213	235.829	135.615	1	63	1	1	2	1	1	1	0	0	0	0	0	0	0	0	0	1	1	8.09211	0
C946380	0.86	14.62	429.14	412.8	20.5	176.3	25.2	216.72	168.366	7.9335	78.2772	25.573	77.369	113.128	2	54	2	2	0	1	0	0	0	0	0	0	0	0	0	0	0	0	1	5.19737	0
C951940	1.57	375.23	244.92	935.72	25.1	394.07	30.4	477.28	344.811	49.2588	356.239	232.913	353.664	273.481	1	67	2	1	2	1	1	0	0	0	0	0	0	0	0	0	0	0	1	1.80921	0
W266051	0.87	86.13	421.95	361.05	21.6	187.92	16.3	141.81	159.544	28.3759	167.813	75.5847	86.7877	47.0809	2	71	1	2	2	0	0	0	0	0	0	0	0	0	0	0	0	1	0	22.5329	0
W272656	0.78	53.82	78	641.94	40.7	317.46	30.2	235.56	226.666	90.7936	276.825	88.0994	181.852	95.1662	1	68	2	2	0	1	0	0	0	0	0	0	0	0	0	0	0	0	1	1.51316	0
W274309	1.37	53.43	349.35	961.74	42.4	580.88	26.5	363.05	390.351	190.529	574.49	171.36	160.105	137.596	2	57	1	2	2	0	0	1	0	0	0	0	0	0	0	0	0	1	1	20.5592	0
W274311	0.68	91.12	258.4	325.72	27.9	189.72	15.2	103.36	126.354	63.3665	186.684	52.3002	49.8195	31.1114	1	72	2	1	2	1	1	0	0	0	0	0	0	0	0	0	0	1	1	29.5066	1
W276343	1.19	107.1	453.39	617.61	29.6	352.24	18.3	217.77	308.562	43.6778	305.744	131.098	124.347	65.9843	1	66	2	1	2	1	1	0	0	0	0	0	0	0	0	0	0	1	1	23.1579	1
W288388	1.41	124.08	40.89	1239.39	46.2	651.42	34.4	485.04	569.992	81.4275	605.169	240.095	103.314	139.206	2	53	2	1	2	0	0	2	0	0	0	0	0	0	0	0	0	0	1	1.80921	0
W290440	1.16	165.88	186.76	798.08	25.7	298.12	40.2	466.32	268.01	30.1101	261.153	131.502	382.382	197.253	1	57	3	2	0	1	0	1	0	0	0	0	0	0	0	0	0	1	0	8.94737	1
1660308	1.05	37.8	163.8	842.1	40.5	425.25	39.2	411.6	353.383	71.8672	416.745	167.11	227.203	209.504	1	40	2	2	0	1	0	0	0	0	0	1	0	0	0	1	1	1	0	27.5329	1
2299524	2.23	133.8	156.1	1935.64	47.8	1065.94	30.7	684.61	518.047	547.893	1065.94	604.511	104.061	297.121	1	74	2	1	2	1	0	0	0	0	0	1	0	0	0	1	1	1	1	10.7566	1
2339622	2.39	167.3	148.18	2055.4	56.5	1350.35	26.9	642.91	1123.49	226.859	1265.28	297.024	343.314	154.941	1	68	2	1	2	1	1	0	0	0	0	1	0	0	0	1	1	1	1	12.5658	1
2344861	0.77	20.79	203.28	534.38	49.9	384.23	18	138.6	351.186	33.0438	380.003	108.247	59.8752	65.835	1	69	2	2	0	1	0	0	1	0	0	0	0	0	0	1	1	1	0	41.0526	1
2346632	2.26	194.36	506.24	1554.88	52.1	1177.46	13.6	307.36	522.792	654.668	1097.39	209.312	94.6669	81.7578	2	63	1	1	2	0	0	1	0	0	0	0	0	0	1	1	1	1	0	11.7105	1
2380907	1	53	444	490	14.3	143	29.7	297	133.991	9.009	139.997	49.302	149.688	170.181	1	63	1	1	0	1	1	0	0	0	0	1	0	0	0	1	1	0	1	5.46053	0
2382421	1.49	73.01	670.5	740.53	32.7	487.23	15.4	229.46	416.582	70.6484	397.58	119.09	89.2599	48.875	1	58	1	2	0	1	0	0	0	0	0	0	0	0	1	1	1	0	1	4.63816	0
2414071	2.04	67.32	234.6	1729.92	50.4	1028.16	26.9	548.76	807.106	221.054	779.345	113.593	368.767	235.967	2	63	1	1	2	0	0	1	0	0	1	0	0	0	0	1	1	1	1	22.7632	1
2426050	1.32	44.88	269.28	1005.84	39.1	516.12	33.5	442.2	423.218	92.9016	438.702	261.782	246.748	195.452	2	64	1	2	2	0	0	0	0	0	0	1	0	0	0	1	1	1	0	22.4342	1
2447698	1.74	87	264.48	1379.82	38.1	662.94	34.7	603.78	420.304	242.636	601.287	465.514	357.438	295.248	1	63	2	1	0	1	1	0	0	0	0	1	0	0	0	1	1	1	0	11.4803	1
2456702	0.97	192.06	360.84	409.34	24.2	234.74	12.5	121.25	221.829	12.9107	123.004	45.9537	83.6625	72.5075	2	52	3	3	1	0	0	2	0	0	0	0	0	1	0	1	1	0	1	4.04605	0
2512884	3.56	1345.68	459.24	1698.12	29.1	1035.96	18.2	647.92	917.861	118.099	956.191	379.681	506.673	247.505	1	63	2	1	2	1	1	0	0	0	0	1	0	0	0	1	1	1	1	16.5461	1
2516671	1.48	137.64	148	1188.44	56.2	831.76	22.6	334.48	667.903	163.857	817.62	234.47	157.206	120.078	1	58	1	2	2	1	1	0	0	0	0	1	0	0	0	1	1	1	0	23.4868	1
2529084	1.69	87.88	424.19	1176.24	41.3	697.97	25.1	424.19	392.957	305.013	584.899	94.5944	212.519	274.451	1	74	2	2	0	1	1	0	0	0	0	1	0	0	0	1	1	1	0	18.125	1
2551255	0.98	64.68	335.16	563.5	41.1	402.78	11.7	114.66	235.626	167.154	402.78	94.3652	29.009	27.6331	1	63	1	3	1	1	1	1	0	0	0	0	0	0	1	1	1	1	1	8.48684	0
C871404	0.79	45.82	281.24	460.57	12.2	96.38	45.3	357.87	92.5248	3.8552	89.1515	45.8074	102.351	221.164	1	70	1	2	2	0	0	1	0	0	0	0	0	0	1	1	1	0	1	2.00658	0
C960238	5	330	85	4510	57.1	2855	22	1100	1598.8	1256.2	745.155	221.1	547.8	272.8	1	70	2	1	2	0	0	0	0	0	0	0	0	0	1	1	1	1	0	23.3224	0
W275560	1.74	74.82	454.14	1171.02	28.6	497.64	29.8	518.52	367.258	130.382	470.27	230.223	303.853	332.89	1	73	2	1	1	1	0	3	0	0	0	1	0	0	0	1	1	0	1	5.49342	0
2031350	1.55	147.25	314.65	1074.15	36.2	561.1	24.9	385.95	429.803	131.297	561.1	198.378	236.973	148.977	1	61	1	1	2	1	0	0	0	0	0	2	0	0	0	2	1	1	1	10.4934	1
2397665	0.77	56.98	217.91	492.03	21.3	164.01	37.7	290.29	120.875	43.1346	96.2739	17.7077	238.618	175.916	1	70	2	1	2	1	0	0	0	0	0	2	0	0	0	2	1	1	0	9.07895	0
2449287	0.89	118.37	281.24	486.83	24.6	218.94	26.3	234.07	185.661	33.2789	197.046	144.889	117.269	69.7529	2	57	1	2	2	0	0	1	0	0	0	2	0	0	0	2	1	1	0	9.47368	0
2527329	1.19	44.03	405.79	737.8	30.7	365.33	25.8	307.02	136.268	229.062	338.661	72.4567	254.52	245.616	1	58	2	1	2	1	1	0	0	0	0	2	0	0	0	2	1	1	0	20.4605	1
2530184	1.68	270.48	174.72	1234.8	43.8	735.84	27.7	465.36	471.673	264.167	735.104	271.305	176.837	179.629	1	67	2	1	2	1	0	0	0	0	0	2	0	0	0	2	1	1	0	16.3158	1
2530461	2.18	263.78	215.82	1693.86	51	1111.8	21.4	466.52	729.341	382.459	1051.76	232.327	363.886	207.135	1	63	2	1	2	1	0	0	2	0	0	0	0	0	0	2	1	1	1	11.7105	0
2550542	1.86	232.5	102.3	1510.32	45.5	846.3	28.8	535.68	576.33	269.97	832.759	161.775	319.265	199.809	1	74	2	1	2	1	1	0	0	0	0	2	0	0	0	2	1	1	1	6.61184	1
2099802	1.18	244.26	376.42	556.96	14.8	174.64	21.8	257.24	164.162	10.4784	164.686	56.0783	140.71	104.439	1	53	1	3	2	0	0	0	3	0	0	0	0	0	1	3	1	0	1	5.88816	1
2183444	1	68	151	775	31.6	316	29.7	297	205.716	110.284	314.104	196.614	80.19	76.032	2	70	1	3	0	0	0	4	0	1	0	3	0	0	1	3	1	1	1	9.375	0
2299934	1.81	88.69	318.56	1368.36	56.5	1022.65	17.5	316.75	873.343	149.307	1010.38	240.096	147.289	116.881	1	71	1	3	0	0	0	1	0	0	0	3	0	0	0	3	1	1	0	27.6974	1
2306959	1.32	137.28	390.72	789.36	37	488.4	20.8	274.56	456.166	32.2344	422.466	106.529	160.892	134.809	2	71	1	3	0	0	0	1	0	0	0	0	0	3	0	3	1	1	1	8.15789	0
2380310	2.2	193.6	209	1790.8	39.7	873.4	41.1	904.2	699.593	173.807	806.148	245.942	763.145	729.689	1	74	2	1	2	1	1	1	0	0	0	0	3	0	0	3	1	1	1	6.84211	1
2389241	0.81	47.79	438.21	299.7	23.6	191.16	12.3	99.63	143.752	47.4077	187.719	68.5454	17.3356	27.3983	1	75	3	1	2	1	0	1	0	0	0	0	3	0	0	3	1	1	0	31.4474	1
2399560	2.49	465.63	463.14	1543.8	38.3	953.67	22.1	550.29	533.102	420.568	953.67	208.01	244.329	182.146	1	60	2	1	2	1	1	0	0	0	0	3	0	0	0	3	1	1	1	6.64474	0
2410517	1.25	101.25	438.75	691.25	20.8	260	26.2	327.5	246.48	13.52	257.14	205.015	261.017	308.177	1	62	1	1	2	1	1	1	3	0	0	0	0	0	0	3	1	0	1	2.69737	0
2414300	2.14	333.84	149.8	1639.24	54.2	1159.88	17.8	380.92	655.332	504.548	1136.68	285.309	118.085	134.846	1	55	1	1	2	1	1	0	3	0	0	1	0	0	0	3	1	1	1	8.55263	1
2425067	0.51	57.63	37.74	413.1	29.3	149.43	33.5	170.85	102.957	46.4727	121.337	50.0591	129.846	119.595	2	64	1	2	2	0	0	1	3	0	0	0	0	0	0	3	1	0	1	1.11842	0
2450158	1.36	126.48	293.76	923.44	48.9	665.04	16	217.6	499.445	165.595	579.25	160.371	111.629	83.9936	2	72	1	2	1	0	0	0	3	0	0	0	0	0	0	3	1	0	1	4.86842	0
2518089	1.29	199.95	432.15	648.87	20.8	268.32	25	322.5	217.071	51.2491	225.925	138.998	141.255	110.617	1	67	2	1	2	1	0	0	0	0	0	3	0	0	0	3	1	1	0	23.4868	1
2518192	0.48	84.96	69.6	322.08	42.1	202.08	22.9	109.92	127.108	74.9717	197.634	27.1502	72.6571	88.0459	1	66	3	1	2	1	0	0	3	0	0	0	0	0	1	3	1	1	0	26.8092	0
2525977	1.84	69.92	217.12	1549.28	29.3	539.12	52.9	973.36	418.357	120.763	403.801	399.078	913.012	898.411	1	66	1	1	2	1	1	0	0	0	0	0	3	0	0	3	1	1	0	22.0724	1
2532772	1.89	137.97	334.53	1404.27	38.6	729.54	30.9	584.01	533.294	196.246	604.789	271.565	282.661	255.796	1	79	2	1	1	1	0	1	3	0	0	0	0	0	0	3	1	0	1	5.52632	1
C141502	1.05	68.25	383.25	597.45	28.6	300.3	26.1	274.05	242.042	58.2582	259.459	86.5998	179.503	89.3403	2	65	1	2	0	0	0	0	3	0	0	0	0	0	0	3	1	0	1	2.30263	0
C917994	1.66	244.02	298.8	1112.2	40.3	668.98	25.4	421.64	457.582	211.398	648.911	234.853	162.753	107.94	1	65	2	1	2	1	0	1	3	0	0	0	0	0	0	3	1	0	1	5.59211	1
C965795	1.12	110.88	191.52	817.6	39.8	445.76	29.8	333.76	310.249	135.511	356.608	92.7853	242.644	141.18	1	62	2	1	2	1	1	1	0	0	3	0	0	0	0	3	1	0	1	5	1
2076479	1.03	37.08	201.88	788.98	35.3	363.59	36.4	374.92	184.34	179.25	355.591	190.459	310.434	333.304	1	72	1	2	0	1	0	0	0	4	0	0	0	2	0	4	1	0	1	3.58553	0
2389898	0.86	11.18	175.44	668.22	23.7	203.82	52.3	449.78	156.534	47.2862	171.209	81.86	264.471	247.829	1	66	2	2	0	1	1	1	0	0	0	4	0	0	0	4	1	0	1	5.78947	0
2420906	0.7	7	65.1	619.5	34.9	244.3	31.1	217.7	150.489	93.8112	230.619	62.0445	94.2641	92.7402	1	79	1	2	0	1	0	0	0	0	0	4	0	0	0	4	1	1	0	11.9079	1
2510586	0.92	188.6	77.28	644	36.5	335.8	30.4	279.68	254.201	81.5994	333.785	127.254	186.547	195.496	1	31	3	1	2	1	0	0	4	0	0	0	0	0	0	4	1	0	1	1.38158	0
2524896	1.06	51.94	212	792.88	36.6	387.96	36.9	391.14	324.335	63.6254	371.666	71.5786	282.794	271.842	1	63	1	1	2	1	0	2	0	0	0	0	4	0	0	4	1	0	1	4.07895	1
C591020	1.76	130.24	286.88	1335.84	51	897.6	21	369.6	627.422	270.178	736.032	204.019	165.581	191.822	2	68	1	2	1	0	0	1	0	0	0	0	0	4	0	4	1	1	1	8.84868	1
